# Supplementary material
Source: Springer Nature journal article supplement (https://www.springerprofessional.de/resource/supplementary/13638_2011_375_MOESM2_ESM.pdf/11897648)

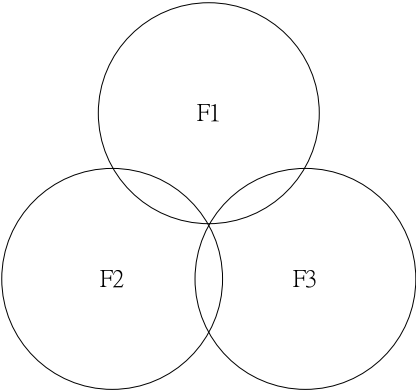

(a)

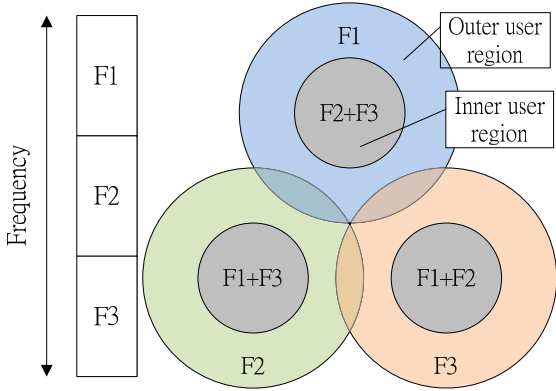

(b)

(c)

Supplement: MOESM2 [file 11897648]
